# Supplementary material for: Epigenetic Control of Translation Checkpoint and Tumor Progression via RUVBL1‐EEF1A1 Axis
Source: PubMed Central journal article supplement (PMC10265057; doi:10.1002/advs.202206584), 2023-04-19
Supplement: ADVS-10-2206584-s001.pdf [file ADVS-10-2206584-s001.pdf]

## Supporting Information

for *Adv. Sci.*, DOI 10.1002/adv.202206584

Epigenetic Control of Translation Checkpoint and Tumor Progression via RUVBL1-EEF1A1 Axis

*Mingli Li, Lu Yang, Anthony K. N. Chan, Sheela Pangen Pokharel, Qiao Liu, Nicole Mattson, Xiaobao Xu, Wen-Han Chang, Kazuya Miyashita, Priyanka Singh, Leisi Zhang, Maggie Li, Jun Wu, Jinhui Wang, Bryan Chen, Lai N. Chan, Jaewoong Lee, Xu Hannah Zhang, Steven T. Rosen, Markus Müschen, Jun Qi, Jianjun Chen, Kevin Hiom, Alexander J. R. Bishop and Chun-Wei Chen\**

## Supporting Information

### Epigenetic control of translation checkpoint and tumor progression via RUVBL1-EEF1A1 axis

Mingli Li<sup>1</sup>, Lu Yang<sup>1,2</sup>, Anthony K.N. Chan<sup>1,2</sup>, Sheela Pangen Pokharel<sup>1,2</sup>, Qiao Liu<sup>1</sup>, Nicole Mattson<sup>1</sup>, Xiaobao Xu<sup>1</sup>, Wen-Han Chang<sup>1</sup>, Kazuya Miyashita<sup>1</sup>, Priyanka Singh<sup>1</sup>, Leisi Zhang<sup>1</sup>, Maggie Li<sup>1</sup>, Jun Wu<sup>3</sup>, Jinhui Wang<sup>3</sup>, Bryan Chen<sup>1</sup>, Lai N. Chan<sup>4</sup>, Jaewoong Lee<sup>4,5,6</sup>, Xu Hannah Zhang<sup>3</sup>, Steven T. Rosen<sup>3</sup>, Markus Müschen<sup>4</sup>, Jun Qi<sup>7</sup>, Jianjun Chen<sup>1,3</sup>, Kevin Hiom<sup>8</sup>, Alexander J.R. Bishop<sup>9,10</sup>, Chun-Wei David Chen<sup>1,2,3,#</sup>

#### Affiliations:

<sup>1</sup>Department of Systems Biology, Beckman Research Institute, City of Hope, Duarte, CA, USA

<sup>2</sup>Division of Epigenetic and Transcriptional Engineering, Beckman Research Institute, City of Hope, Duarte, CA, USA

<sup>3</sup>City of Hope Comprehensive Cancer Center, Duarte, CA, USA

<sup>4</sup>Center of Molecular and Cellular Oncology, Yale Cancer Center, Yale School of Medicine, New Haven, CT, USA

<sup>5</sup>School of Biosystems and Biomedical Sciences, College of Health Science, Korea University, Seoul, South Korea

<sup>6</sup>Interdisciplinary Program in Precision Public Health, Korea University, Seoul, South Korea

<sup>7</sup>Department of Cancer Biology, Dana-Farber Cancer Institute, Harvard Medical School, Boston, MA, USA

<sup>8</sup>Division of Cellular Medicine, School of Medicine, University of Dundee, Scotland, UK.

<sup>9</sup>Department of Cellular Systems and Anatomy, University of Texas Health Science Center at San Antonio, San Antonio, Texas, USA

<sup>10</sup>Greehey Children's Cancer Research Institute, University of Texas Health Science Center at San Antonio, San Antonio, Texas, USA

#### Figure S1 to S13

#### Table S1 to S5

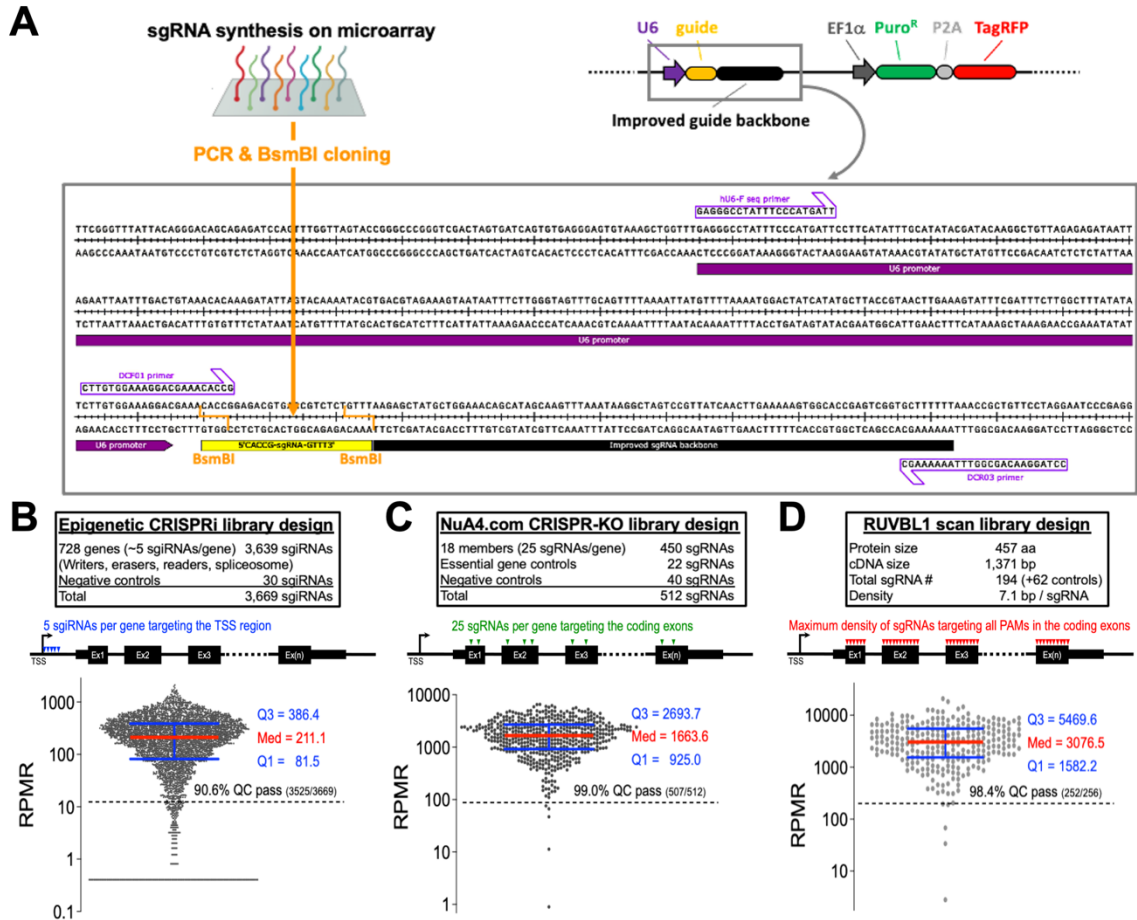

**Figure S1. CRISPR genetic screen libraries used in this study.**

(A) Map of the ipUSEPR vector expressing a sgRNA together with a puromycin-resistant gene (PuroR) and a TagRFP fluorescent protein. Primers for Sanger (hU6-F\_seq) and Illumina (DCF01 and DCR03) sequencing are listed. (B-D) Design and distribution of individual sgRNA frequencies RPMR (reads per million reads) in the CRISPR libraries targeting (B) epigenetic-related genes, (C) NuA4 complex members, and (D) coding regions of *RUVBL1*. (B) 90.6%, (C) 99.0%, and (D) 98.4% of sgRNA in these libraries passed the QC by exhibiting  $\geq 5\%$  of average frequency.

### A CRISPR interference (CRISPRi) system

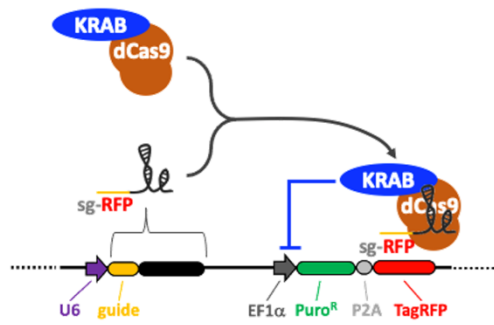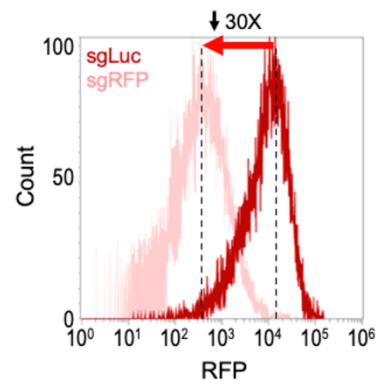

### B CRISPR knockout (CRISPR-KO) system

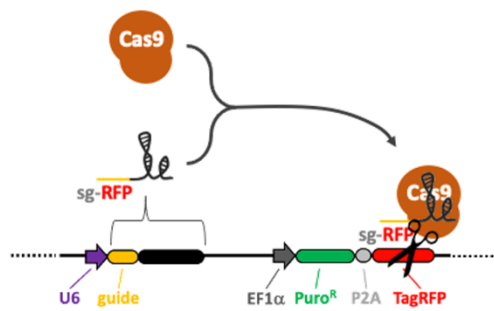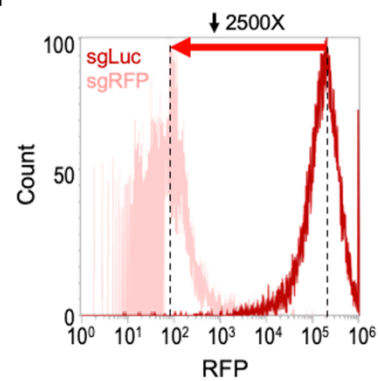

**Figure S2. Validation of CRISPR efficiency using an RFP inactivation assay.**

(A) CRISPR interference and (B) CRISPR knockout cell systems used in this study. The reduced expression of EF1 $\alpha$ -driven RFP in the ipUSEPR vector serves as a reporter of CRISPR editing efficiency.

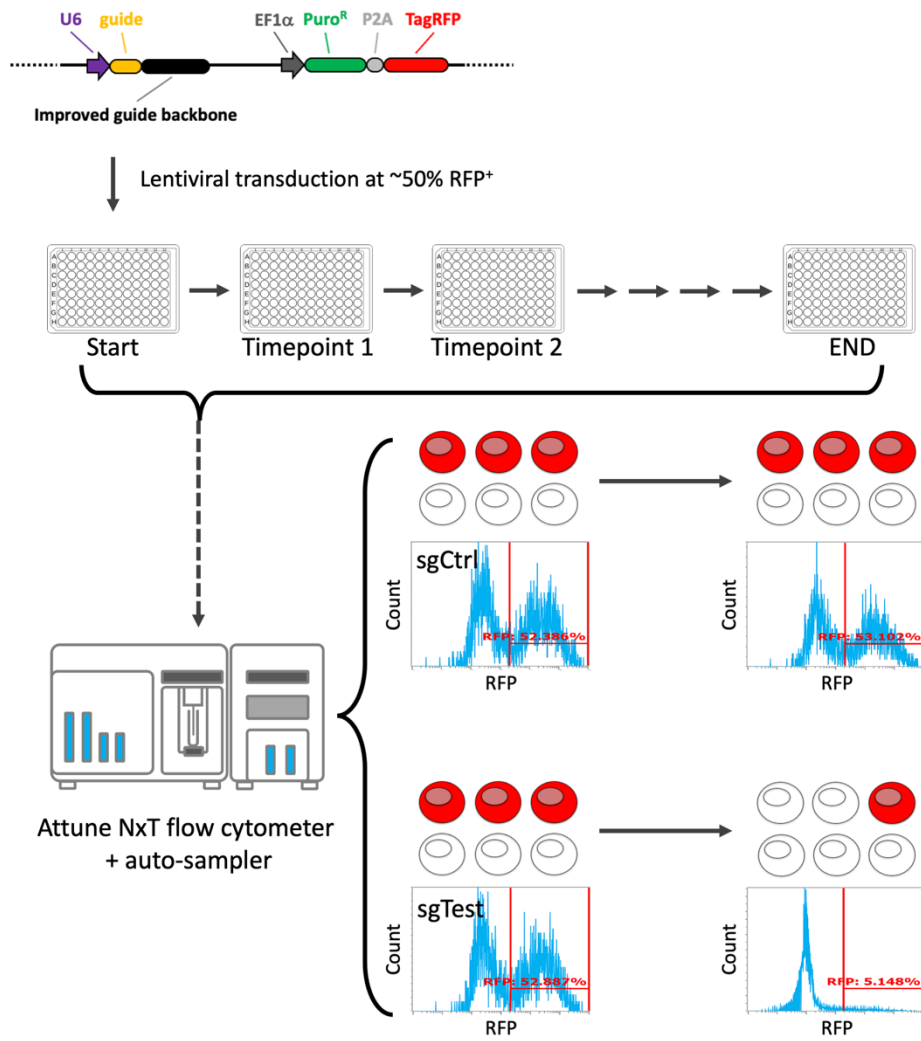

**Figure S3. Schematic outline of the RFP flow cytometric growth competition assay.**

| Source Name | Patient ID | RUVBL1 exp. | Age | Diagnosis | EFS (months) | OVS (months) | Gender | Status |
|-------------|------------|-------------|-----|-----------|--------------|--------------|--------|--------|
| GSM439907   | R52        | 1.317       | 22  | Ewing     | 14.4         | 23.2         | F      | dead   |
| GSM439914   | R61        | 1.289       | 15  | Ewing     | 16.2         | 16.2         | M      | NED    |
| GSM439906   | R51        | 1.266       | 24  | Askin     | 4.6          | 10.9         | M      | dead   |
| GSM439893   | R37        | 1.254       | 11  | Ewing     | 9.8          | 9.8          | M      | dead   |
| GSM439911   | R57        | 1.252       | 11  | Ewing     | 2            | 8.7          | M      | dead   |
| GSM439900   | R44        | 1.249       | 30  | Ewing     | 19.8         | 25.6         | F      | dead   |
| GSM439922   | R74        | 1.239       | 27  | PNET      | 110.4        | 110.4        | M      | NED    |
| GSM439912   | R58        | 1.237       | 22  | Ewing     | 13.4         | 13.4         | M      | dead   |
| GSM439896   | R40        | 1.219       | 24  | Ewing     | 18.2         | 117.3        | M      | NED    |
| GSM439913   | R60        | 1.216       | 12  | Ewing     | 121.5        | 121.5        | M      | NED    |
| GSM439890   | R33        | 1.212       | 15  | Ewing     | 16.6         | 16.6         | M      | dead   |
| GSM439892   | R35        | 1.211       | 16  | Ewing     | 10           | 13.6         | F      | dead   |
| GSM439905   | R50        | 1.206       | 16  | PNET      | 58.3         | 99.3         | M      | dead   |
| GSM439916   | R63        | 1.187       | 13  | Ewing     | 43.4         | 43.4         | M      | NED    |
| GSM439929   | R84        | 1.173       | 9   | Ewing     | 27.9         | 41.6         | M      | dead   |
| GSM439899   | R43        | 1.172       | 17  | Ewing     | 24.8         | 35.7         | F      | dead   |
| GSM439927   | R81        | 1.152       | 24  | Ewing     | 34.4         | 81.4         | M      | dead   |
| GSM439901   | R45        | 1.144       | 15  | Askin     | 17.9         | 24.6         | M      | dead   |
| GSM439910   | R55        | 1.138       | 16  | PNET      | 6.8          | 8.5          | F      | dead   |
| GSM439902   | R46        | 1.135       | 7   | PNET      | 22.1         | 64.2         | F      | dead   |
| GSM439918   | R65        | 1.131       | 20  | Ewing     | 11           | 11           | F      | dead   |
| GSM439894   | R38        | 1.131       | 23  | Ewing     | 11.3         | 11.3         | M      | dead   |
| GSM439924   | R78        | 1.128       | 11  | PNET      | 69.5         | 69.5         | F      | NED    |
| GSM439888   | R29        | 1.128       | 21  | Ewing     | 4.6          | 4.6          | M      | dead   |
| GSM439897   | R41        | 1.115       | 15  | Ewing     | 125.1        | 125.1        | M      | NED    |
| GSM439904   | R49        | 1.115       | 34  | Ewing     | 18.6         | 126.2        | M      | NED    |
| GSM439903   | R48        | 1.111       | 17  | Ewing     | 31.6         | 46.2         | M      | dead   |
| GSM439898   | R42        | 1.110       | 18  | Ewing     | 192.2        | 192.2        | M      | NED    |
| GSM439915   | R62        | 1.105       | 16  | Ewing     | 117.6        | 117.6        | M      | NED    |
| GSM439926   | R80        | 1.100       | 8   | PNET      | 23.9         | 68.5         | F      | NED    |
| GSM439928   | R83        | 1.097       | 4   | PNET      | 70.1         | 129.1        | F      | NED    |
| GSM439920   | R69        | 1.095       | 9   | Ewing     | 62.6         | 62.6         | F      | NED    |
| GSM439895   | R39        | 1.083       | 16  | Ewing     | 47           | 47           | F      | dead   |
| GSM439909   | R54        | 1.076       | 22  | Ewing     | 25.9         | 61.5         | M      | dead   |
| GSM439925   | R79        | 1.057       | 21  | PNET      | 127.1        | 127.1        | M      | NED    |
| GSM439921   | R72        | 1.054       | 32  | PNET      | 31.5         | 117.7        | F      | NED    |
| GSM439908   | R53        | 1.038       | 19  | Ewing     | 87.7         | 87.7         | F      | NED    |
| GSM439917   | R64        | 1.002       | 25  | Ewing     | 15.3         | 21.3         | M      | dead   |
| GSM439919   | R67        | 0.988       | 14  | Ewing     | 16.7         | 29.4         | M      | dead   |
| GSM439887   | R196       | 0.975       | 5   | Ewing     | 14           | 20.7         | M      | dead   |
| GSM439886   | R194       | 0.952       | 32  | Ewing     | 11.7         | 15.6         | F      | dead   |
| GSM439889   | R30        | 0.919       | 26  | Ewing     | 28.6         | 48.9         | F      | NED    |
| GSM439923   | R75        | 0.918       | 14  | PNET      | 9.8          | 25.4         | M      | dead   |
| GSM439891   | R34        | 0.815       | 18  | Ewing     | 19.4         | 56.5         | M      | AWD    |

Ewing: Ewing sarcoma; Askin: Askin tumor; PNET: Primitive neuroectodermal tumor

EFS: Event free survival; OVS: Overall survival

NED: No evidence of disease; AW: Alive with disease

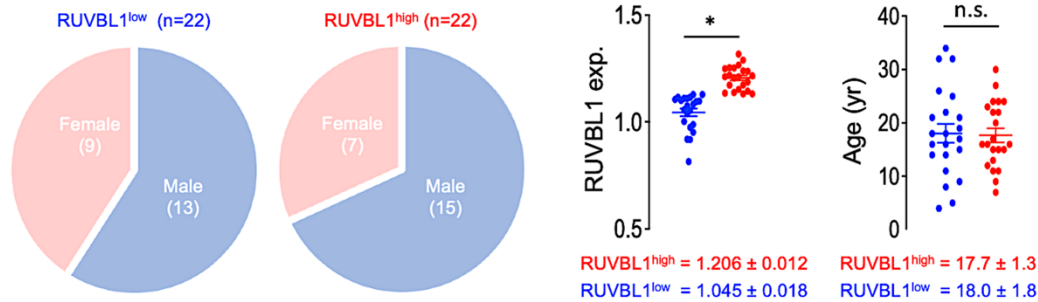

**Figure S4. Information of patients with Ewing sarcoma family of tumors.**

Source: EMBL-EBI (E-GEOD-17618)

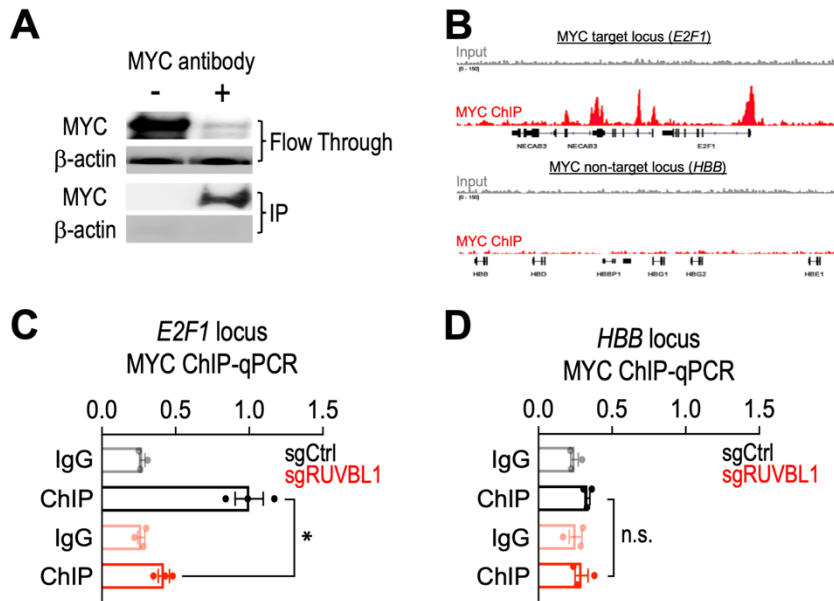

**Figure S5. Evaluation of MYC ChIP-seq in EwS cells.**

(A) Efficient capture of MYC protein using a rabbit mAb D3N8F (13987S, Cell Signaling Technology; 1:400). (B) Profiles of MYC ChIP-seq at *E2F1* (E2F Transcription Factor 1; an MYC target locus) and *HBB* (Hemoglobin Subunit Beta; an MYC non-target locus) loci in A673 cells. MYC ChIP-qPCR at (C) *E2F1* and (D) *HBB* loci in A673 cells transduced with sgCtrl and sgRUVBL1. Data are represented as mean  $\pm$  SEM. \*P < 0.01 compared to sgCtrl by two-sided Student's t-test.

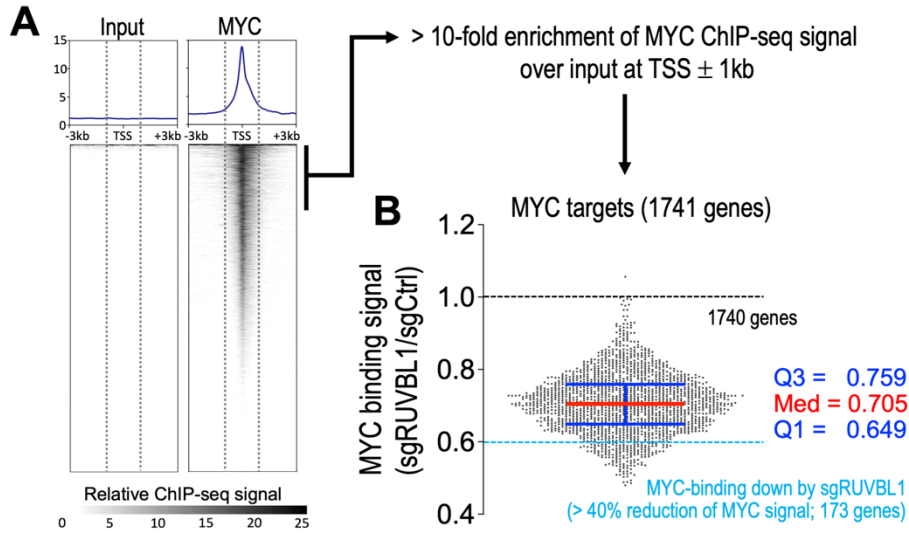

**Figure S6. Evaluation of MYC chromatin binding targets.**

(A) MYC ChIP-seq signal for each gene was calculated from the pileup files around TSS  $\pm$  1kb regions. Genes with more than 10-fold enrichment of MYC ChIP-seq signal in the MYC antibody captured sample over the input sample (without ChIP enrichment) were selected as MYC targets (1741 genes). (B) Depletion of RUVBL1 led to reduced MYC binding signals in the majority of MYC targets (median ratio 0.705), suggesting that RUVBL1 serves as a master regulator of MYC's chromatin binding.



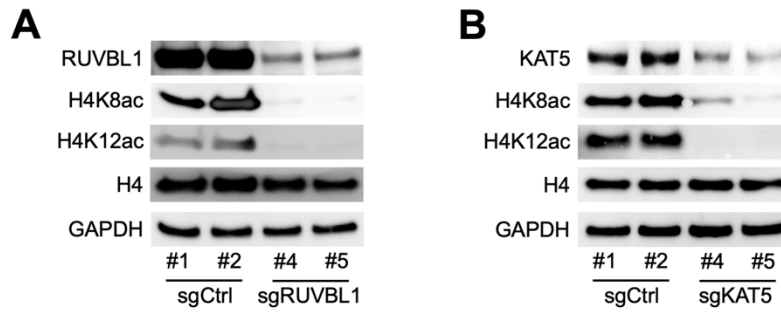

**Figure S7. Validation of the effects of sgRUVBL1 and sgKAT5 on histone H4 acetylation.**

(A) Western blot of RUVBL1, H4K8ac, H4K12ac, histone H4, and GAPDH in A673-Cas9 cells transduced with sgCtrl (#1 and #2) vs. sgRUVBL1 (#4 and #5). (B) Western blot of KAT5, H4K8ac, H4K12ac, histone H4, and GAPDH in A673-Cas9 cells transduced with sgCtrl (#1 and #2) vs. sgKAT5 (#4 and #5). The guide RNA sequences are listed in Table S1.

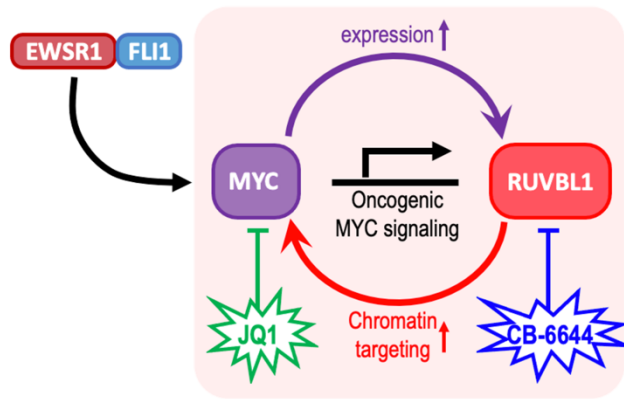

**Figure S8. Model of combinational targeting the RUVBL1/MYC feed-forward network by CB-6644 and JQ1 in EwS.**

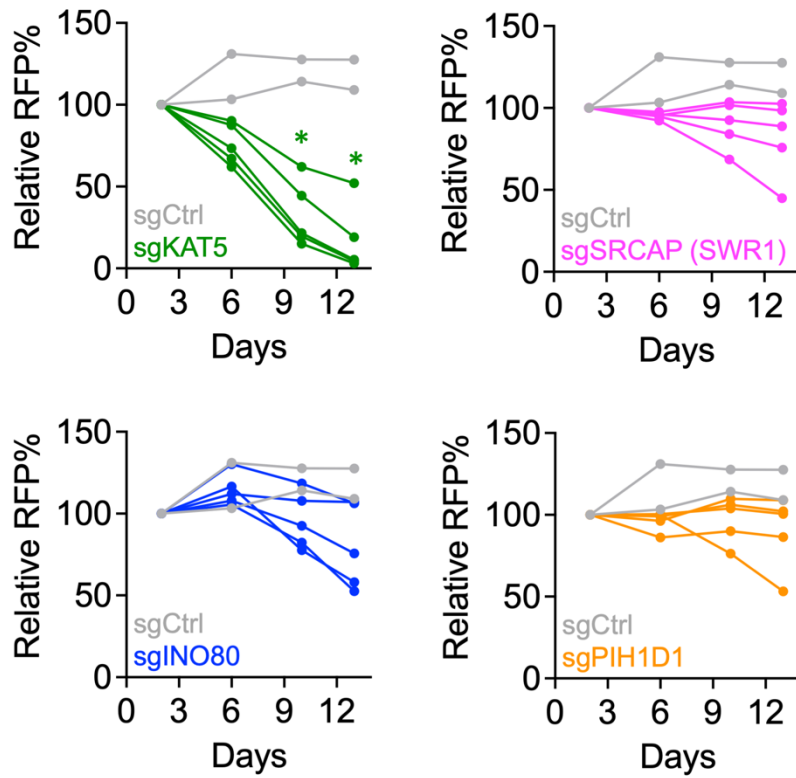

**Figure S9. Roles of KAT5, SRCAP, INO80, and PIH1D1 in A673 cells.**

Growth competition assay of sgCtrl (grey lines; n = 2 independent sgRNA sequences), sgKAT5 (a NuA4 complex member; green lines; n = 5 independent sgRNA sequences), sgSRCAP (a SWR1 complex member; pink lines; n = 5 independent sgRNA sequences), sgINO80 (an INO80 complex member; blue lines; n = 5 independent sgRNA sequences), and sgPIH1D1 (an R2TP complex member; orange lines; n = 5 independent sgRNA sequences) in A673-Cas9 cells. \*P < 0.01 compared to sgCtrl by two-sided Student's t-test.

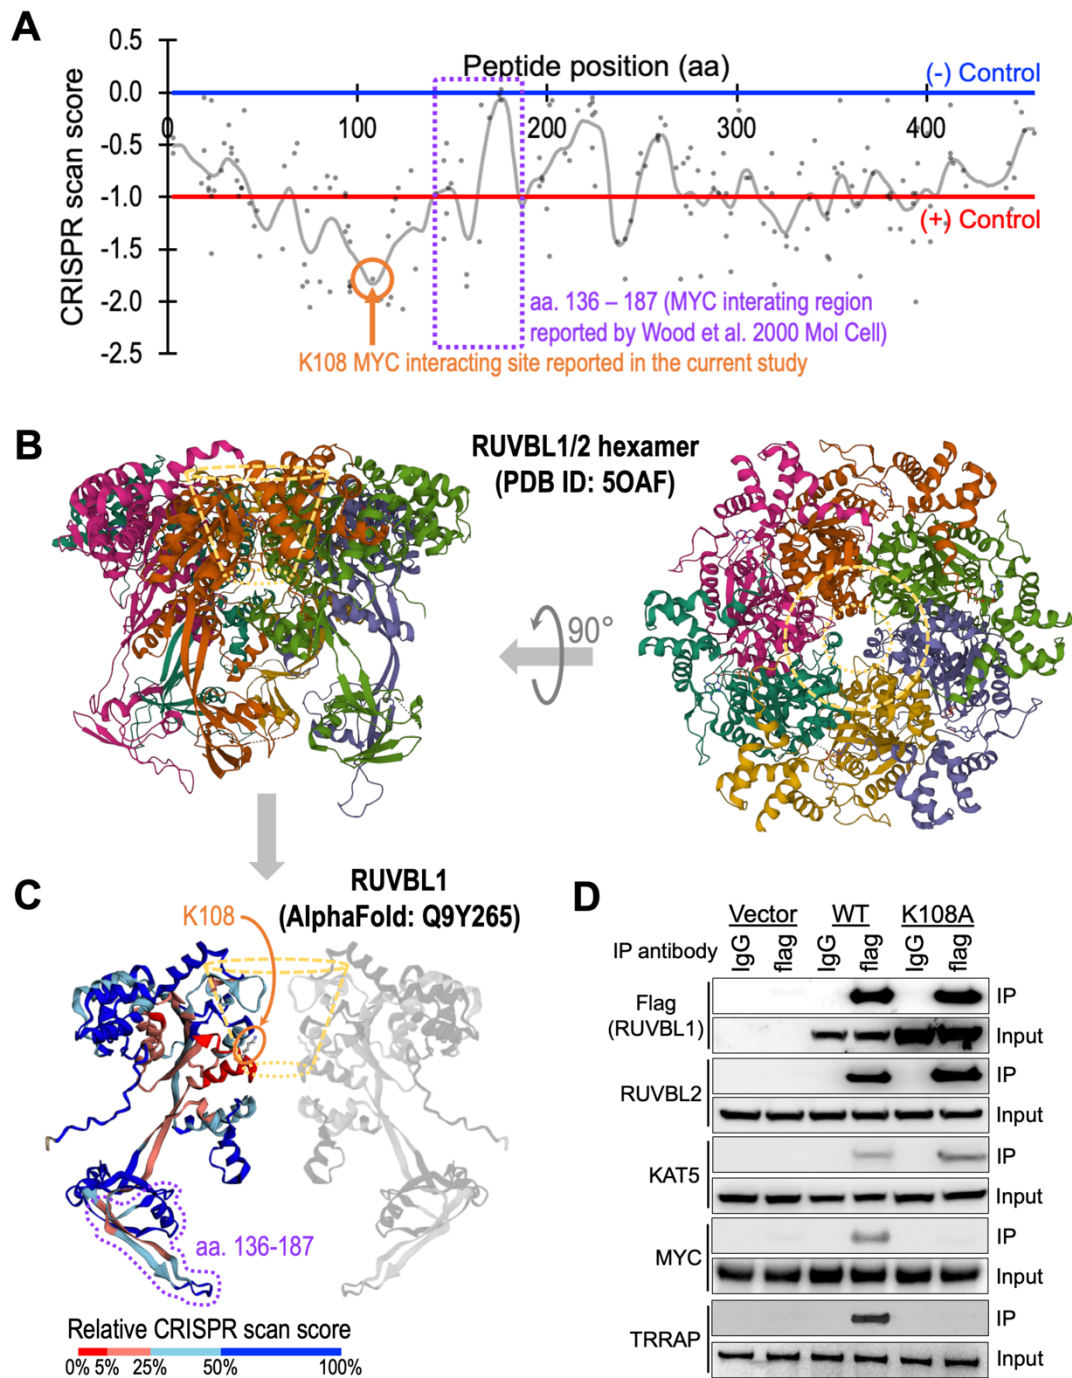

**Figure S10. Comparison of the MYC interacting regions in RUVBL1 reported by different studies.**

(A) Two-dimensional annotation of the MYC binding regions (K108 vs. aa. 136 – 187) relative to the RUVBL1 CRISPR gene body scan profile. (B) Side (left) and top (right) views of the RUVBL1/2 hexamer cryo-EM structure (PDB ID: 5OAF). (C) Three-dimensional annotation of the CRISPR scan score and MYC binding regions (K108 vs. aa. 136 – 187) relative to an AlphaFold model of RUVBL1 (Q9Y265). The RUVBL1/2 hexamer central pocket is highlighted (yellow dashed pocket). (D) Co-IP of WT- and K108A-RUVBL1 (flag-tagged) with RUVBL2, KAT5, MYC, and TRRAP in HEK293 cells.

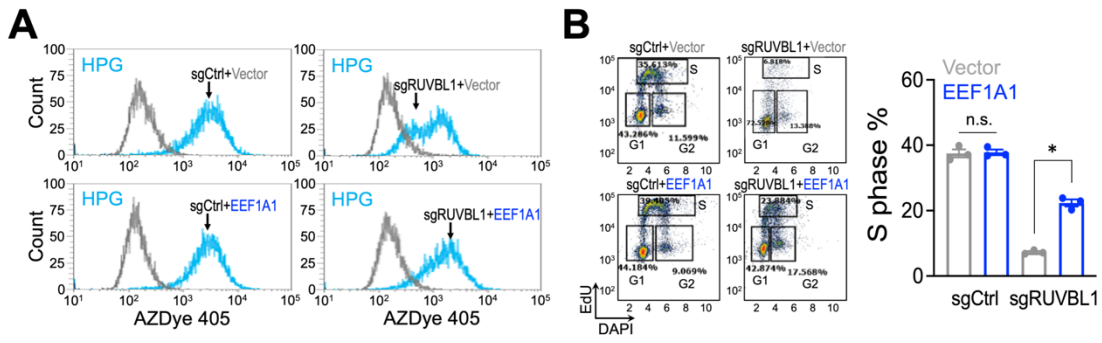

**Figure S11. Expression of EEF1A1 partially rescues the RUVBL1-depleted EwS cells.**

(A) Effect of EEF1A1 cDNA expression on flow cytometric profiles of HPG labeled (cyan) compared to the non-labeled (grey) cells in A673 cultures transduced with sgCtrl and sgRUVBL1. (B) Effect of EEF1A1 cDNA expression on cell cycle monitored by EdU incorporation. Data are represented as mean  $\pm$  SEM. \*P < 0.05 by two-sided Student's t-test.

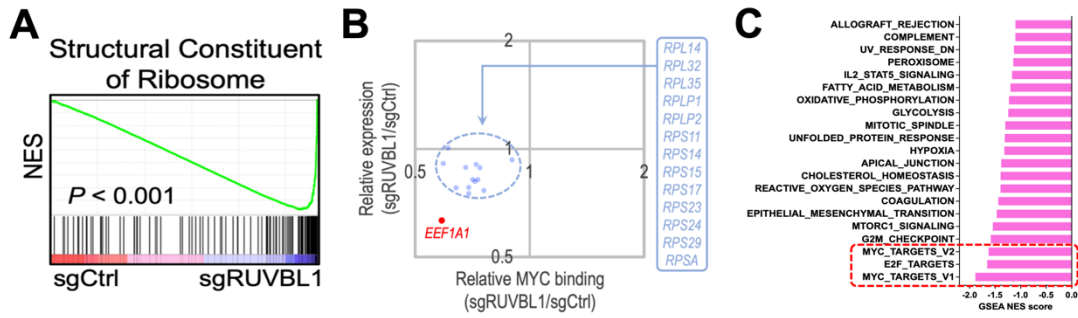

**Figure S12. Effect of RUVBL1-depletion on gene expression.**

(A) RNA-seq and GSEA analysis showing a reduced expression of the “Structural Constituent of Ribosome” gene set in the RUVBL1 depleted A673 cells. (B) *EEF1A1* (red dot) exhibited a more pronounced reduction in both MYC binding and expression levels upon RUVBL1 depletion than the other 13 MYC-targeted ribosomal genes (blue dots). (C) RNA-seq and GSEA analysis showing top depleted Hallmark gene sets in the sgRUVBL1 transduced A673 cells.

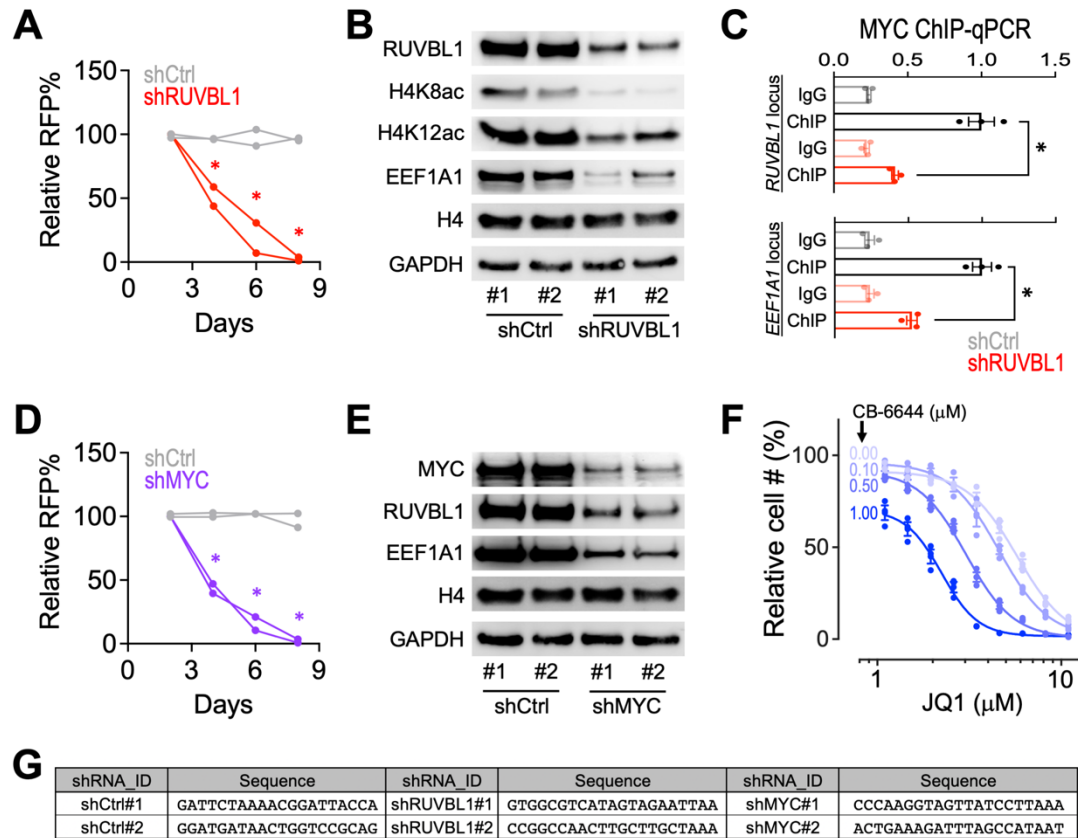

**Figure S13. RUVBL1-MYC-EEF1A1 axis in Burkitt lymphoma cells.**

(A) Growth competition assay of Ramos cells transduced with RFP-labeled shCtrl (grey lines; n = 2 independent shRNA sequences) and shRUVBL1 (red lines; n = 2 independent shRNA sequences). (B) Western blot of RUVBL1, H4K8ac, H4K12ac, EEF1A1, histone H4, and GAPDH in Ramos cells transduced with shCtrl vs. shRUVBL1 (2 independent shRNA sequences per group). (C) MYC ChIP-qPCR at the *RUVBL1* and *EEF1A1* loci in Ramos cells transduced with shCtrl and shRUVBL1 (n = 3 for each group). (D) Growth competition assay of Ramos cells transduced with RFP-labeled shCtrl (grey lines; n = 2 independent shRNA sequences) and shMYC (purple lines; n = 2 independent shRNA sequences). (E) Western blot of MYC, RUVBL1, EEF1A1, histone H4, and GAPDH in Ramos cells transduced with shCtrl vs. shMYC (2 independent shRNA sequences per group). (F) Effect of JQ1 and CB-6644 combination on the proliferation of Ramos cells (n = 3 for each condition). Relative cell # (%) of each CB-6644 condition was normalized to the samples without JQ1 treatment. (G) Sequences of shCtrl, shRUVBL1, and shMYC used in this study. Data are represented as mean  $\pm$  SEM. \*P < 0.01 compared to shCtrl by two-sided Student's t-test.

**Table S1. CRISPR-KO sgRNA sequences.**

| sgRNA_ID   | Sequence             |
|------------|----------------------|
| sgCtrl#1   | GATTCTAAAACGGATTACCA |
| sgCtrl#2   | GGATGATAACTGGTCCGCAG |
| sgRUVBL1#1 | ACTTGATGTGGCTAATGCG  |
| sgRUVBL1#2 | GGAAGGAATCAACATCAGTG |
| sgRUVBL1#3 | GTGAACAAGTACATCGACCA |
| sgRUVBL1#4 | TGGTCCGGATTATCATCACT |
| sgRUVBL1#5 | CATCAACAAACAGCACACCC |
| sgKAT5#1   | GGGTACGGGGAGAAGTACCA |
| sgKAT5#2   | ACTTGAGGCAGAACTCGCAC |
| sgKAT5#3   | AGGCAATGAGATTTACCGCA |
| sgKAT5#4   | AACACTTGGCCAAAAGACAC |
| sgKAT5#5   | GATTGATGGACGTAAGAACA |
| sgMYC#1    | CTATGACCTCGACTACGACT |
| sgMYC#2    | AGAGTGCATCGACCCCTCGG |
| sgMYC#3    | CTTCGGGGAGACAACGACGG |
| sgMYC#4    | CGAGGAGAGCAGAGAATCCG |
| sgMYC#5    | CCAGAGTTTCATCTGCGACC |
| sgEEF1A1#1 | ATTACAGGGACATCTCAGGT |
| sgEEF1A1#2 | CATCTGATCTATAAATGCGG |
| sgEEF1A1#3 | TTAATCCTTACAGATGGGAA |
| sgEEF1A1#4 | TGCTCCAGTCAACGTTACAA |
| sgEEF1A1#5 | AAGCCACTTACGTTAGCACT |

**Table S2. CRISPRi sgiRNA sequences.**

| sgiRNA_ID   | Sequence            |
|-------------|---------------------|
| sgiCtrl#1   | GAGTCGGGTAAATAGACAA |
| sgiCtrl#2   | CTACGCCCGGGGAAAAGA  |
| sgiRUVBL1#1 | GGCCAGGAGAACGCGCGAG |
| sgiRUVBL1#2 | AACGGCCGCATGGTAACTC |



**Table S3. Summary of RNAi and CRISPR library screens in EwS.**

| Types               | Scopes                                                      | Identified targets                 | Libraries                            | References                |
|---------------------|-------------------------------------------------------------|------------------------------------|--------------------------------------|---------------------------|
| RNAi screens        | Screen for kinases involved in EwS growth                   | STK10 and TNK2                     | Kinase siRNA library (572 genes)     | Arora et al., 2010 [1]    |
|                     | Screen for EWSR1-FLI1 regulators                            | HNRNPH1 and SF3B1                  | Genome-scale siRNA library           | Grohar et al., 2016 [2]   |
|                     | Screen for effectors in EwS cell survival                   | LRWD1                              | Druggable siRNA library (6781 genes) | He et al., 2016 [3]       |
| CRISPR-Cas9 screens | Screen for genetic dependencies in TP53 wild-type EwS cells | MDM2, MDM4, USP7, and PPM1D        |                                      | Stolte et al., 2018 [4]   |
|                     | Screen for regulators mediating EWSR1-FLI1 stability        | TRIM8                              | Genome-scale CRISPR-Cas9 library     | Seong et al., 2021 [5]    |
|                     | Screen for modulators of LSD1 inhibition in EwS             | Mitochondrial complexes III and IV |                                      | Tokarsky et al., 2022 [6] |

Table modified from Li et al. 2022 [7]

**Table S4. RT-qPCR primers.**

| Primer_ID | Sequence                |
|-----------|-------------------------|
| RUVBL1_F  | AAAGAGCGAGTAGAAGCTGGA   |
| RUVBL1_R  | CCAAGTCATGCAAGGTCACATC  |
| EEF1A1_F  | GAAGCTGGTATCTCCAAGAATGG |
| EEF1A1_R  | CGACAATTAGTTGTTTCACACCC |
| GAPDH_F   | CCTCCTAGGCCTTTGCCTGA    |
| GAPDH_R   | CTGAGAGGCGGAAAGTTGG     |

**Table S5. ChIP-qPCR primers.**

| Primer_ID    | Sequence               |
|--------------|------------------------|
| RUVBL1_TSS_F | GGTGACCTCCAGTTCCTAGACC |
| RUVBL1_TSS_R | GGTCCGGCCCGTTAAGTT     |
| EEF1A1_TSS_F | ACTTTCCAGTTTACCCCGC    |
| EEF1A1_TSS_R | CCACAGTCCCCGAGAAGTTG   |

## Supplementary References

- [1] S. Arora, I. M. Gonzales, R. T. Hagelstrom, C. Beaudry, A. Choudhary, C. Sima, R. Tibes, S. Mousses, D. O. Azorsa, *Mol Cancer* **2010**, *9*, 218, <https://doi.org/10.1186/1476-4598-9-218>.
- [2] P. J. Grohar, S. Kim, G. O. Rangel Rivera, N. Sen, S. Haddock, M. L. Harlow, N. K. Maloney, J. Zhu, M. O'Neill, T. L. Jones, K. Huppi, M. Grandin, K. Gehlhaus, C. A. Klumpp-Thomas, E. Buehler, L. J. Helman, S. E. Martin, N. J. Caplen, *Cell Rep* **2016**, *14* (3), 598, <https://doi.org/10.1016/j.celrep.2015.12.063>.
- [3] T. He, D. Surdez, J. K. Rantala, S. Haapa-Paananen, J. Ban, M. Kauer, E. Tomazou, V. Fey, J. Alonso, H. Kovar, O. Delattre, K. Iljin, *Gene* **2017**, *596*, 137, <https://doi.org/10.1016/j.gene.2016.10.021>.
- [4] B. Stolte, A. B. Iniguez, N. V. Dharia, A. L. Robichaud, A. S. Conway, A. M. Morgan, G. Alexe, N. J. Schauer, X. Liu, G. H. Bird, A. Tsherniak, F. Vazquez, S. J. Buhrlage, L. D. Walensky, K. Stegmaier, *J Exp Med* **2018**, *215* (8), 2137, <https://doi.org/10.1084/jem.20171066>.
- [5] B. K. A. Seong, N. V. Dharia, S. Lin, K. A. Donovan, S. Chong, A. Robichaud, A. Conway, A. Hamze, L. Ross, G. Alexe, B. Adane, B. Nabet, F. M. Ferguson, B. Stolte, E. J. Wang, J. Sun, X. Darzacq, F. Piccioni, N. S. Gray, E. S. Fischer, K. Stegmaier, *Cancer Cell* **2021**, *39* (9), 1262, <https://doi.org/10.1016/j.ccell.2021.07.003>.
- [6] E. J. Tokarsky, J. C. Crow, L. M. Guenther, J. Sherman, C. Taslim, G. Alexe, K. I. Pishas, G. Rask, B. S. Justis, A. Kasumova, K. Stegmaier, S. L. Lessnick, E. R. Theisen, *Mol Cancer Res* **2022**, <https://doi.org/10.1158/1541-7786.MCR-22-0027>.
- [7] M. Li, C. W. Chen, *Biomedicines* **2022**, *10* (6), <https://doi.org/10.3390/biomedicines10061325>.
